# Supplementary material for: mLiftOver: harmonizing data across Infinium DNA methylation platforms
Source: PubMed Central journal article supplement (PMC11233119; doi:10.1093/bioinformatics/btae423), 2024-07-04
Supplement: btae423_supplementary_data.pdf [file btae423_supplementary_data.pdf]

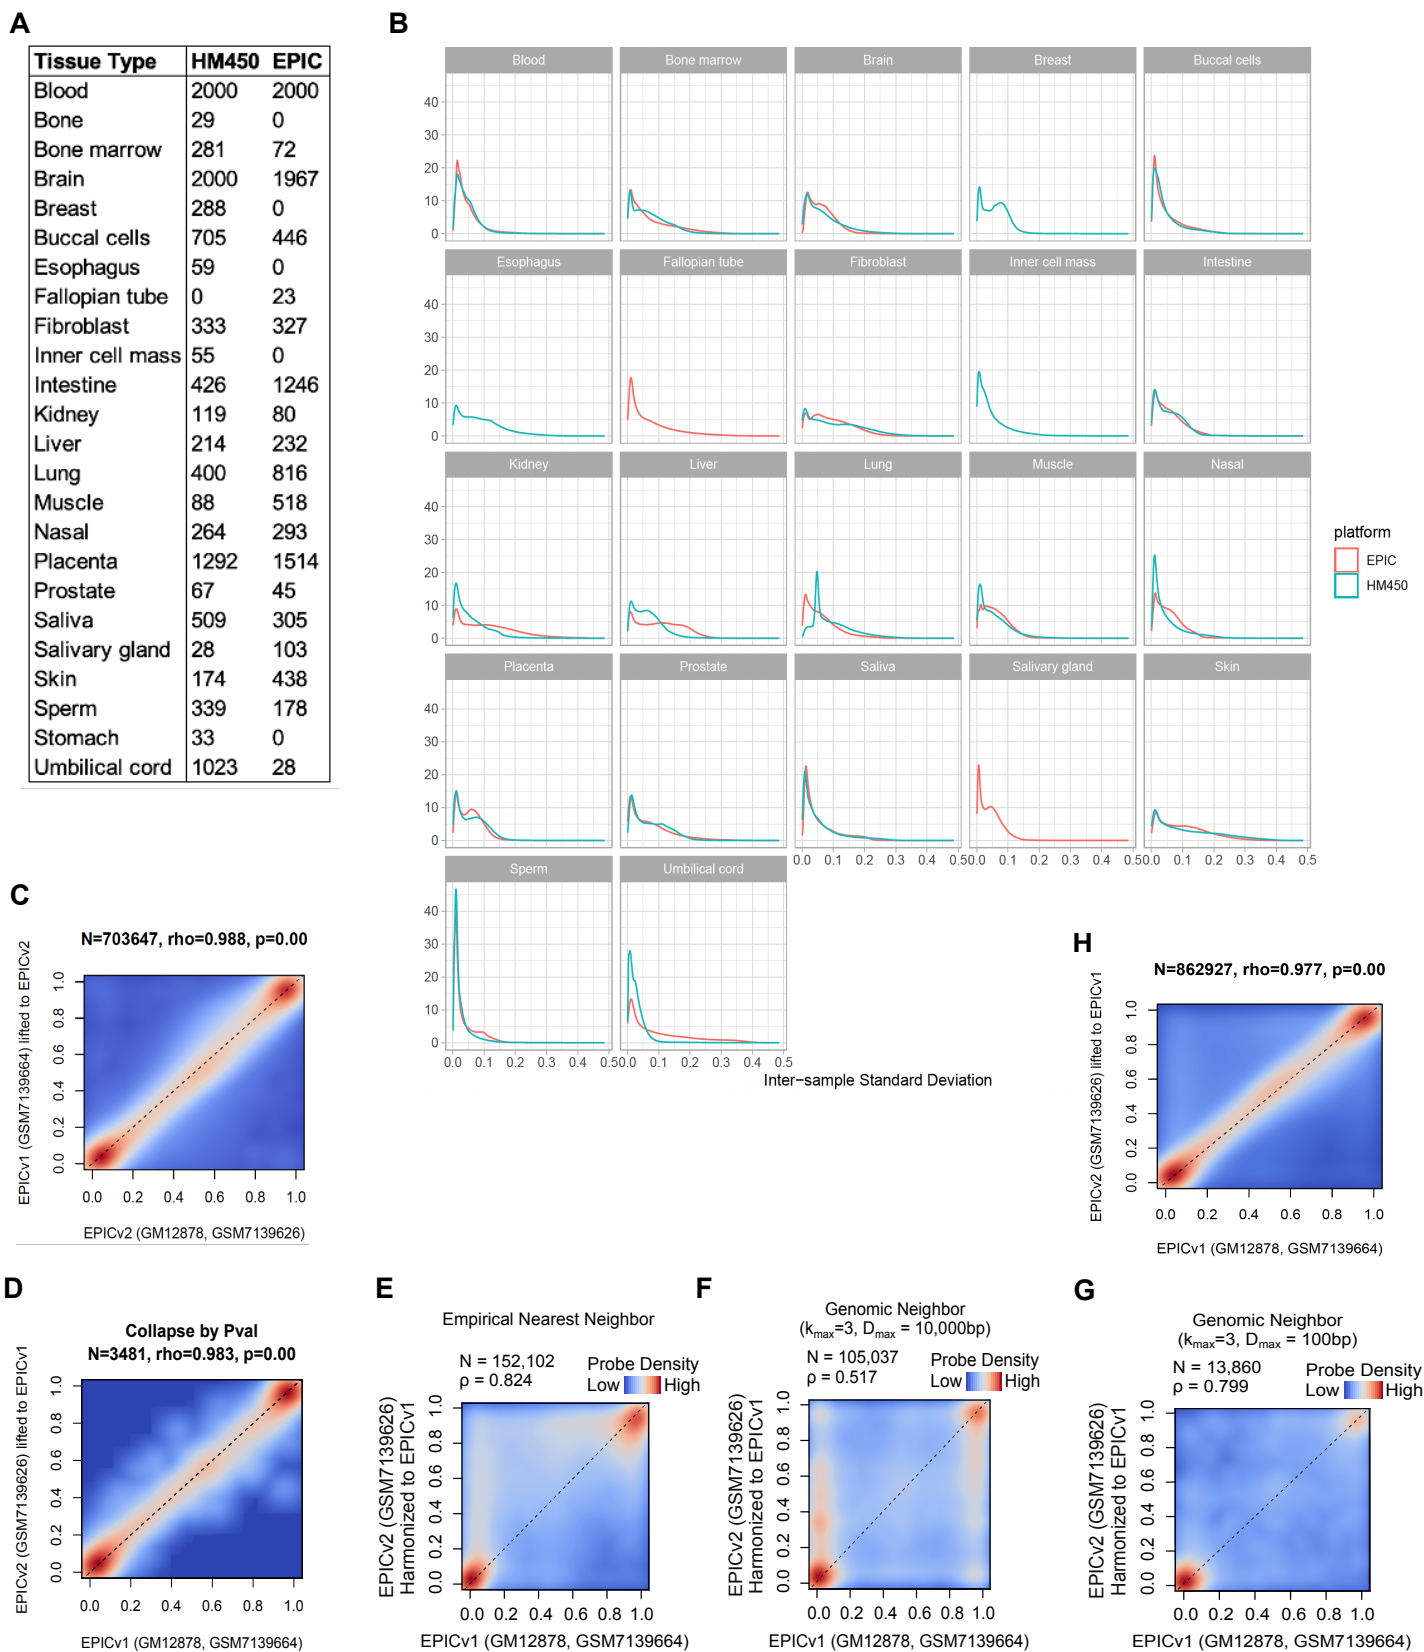

**Supplemental Figure S1. mLiftOver harmonizes Infinium DNA methylation BeadChip data across array platforms.** (A) Count of datasets (samples) used to derive baseline methylation imputation reference. (B) Methylation level standard deviation in datasets stratified by tissue type and Infinium platforms (HM450 and EPIC). (C) Evaluation of mLiftOver accuracy in translating cell line data from EPICv1 to EPICv2 (Y-axis), benchmarked against native EPICv2 data (X-axis). (D) Aggregation of replicate probes by minimal detection P-value. (E) imputation of missing probe readings without exclusion by methylation level standard deviation. (F,G) Comparison of empirical nearest neighbor imputation with genomic neighbor averaging with maximum distance 10kbp (F) and 100bp (G). (H) Overall accuracy, including both directly translated and imputed probe readings.
